# Supplementary material for: Water Soluble Cationic Porphyrin Sensor for Detection of Hg2+, Pb2+, Cd2+, and Cu2+
Source: Hindawi journal article supplement (doi:10.1155/2016/1905454), 2016-01-01
Supplement: f1 [file 1905454.f1.pdf]

**Figure S1.** The electronic absorption of aqueous solution of **1** upon addition of (a)  $\text{Zn}^{2+}$ , (b)  $\text{Fe}^{3+}$ , (c)  $\text{Ni}^{2+}$ , (d)  $\text{Co}^{2+}$ , (e)  $\text{Na}^+$ , and (f),  $\text{K}^+$

**Figure S2.** The electronic absorption of aqueous solution of **1** ( $5.0 \times 10^{-6}$  M) upon addition of (a)  $\text{Hg}^{2+}$  (0-10 equivalent), (b)  $\text{Pb}^{2+}$  (0-10 equivalent), (a)  $\text{Cd}^{2+}$  (0-10 equivalent), and (a)  $\text{Cu}^{2+}$  (0-10 equivalent) ions

**Figure S3.** The electronic absorption spectra of aqueous solution of **1** ( $5.0 \times 10^{-6}$  M) upon addition of increasing amount [ 0.12, 0.25, 0.38, 0.51, 0.63, 0.89, and 1.27 ( $\times 10^{-6}$  M)] of  $\text{Hg}^{2+}$ ,  $\text{Pb}^{2+}$ ,  $\text{Cd}^{2+}$ , and  $\text{Cu}^{2+}$  ions. The inset displays a zoomed view of the visible portion of the spectra

**Figure S4.** The electronic absorption of aqueous solution of **1** ( $5.0 \times 10^{-6}$  M) upon addition of increasing amount (a) [ 0, 0.5, 1.25, 2, 2.5, and 3.75 ( $\times 10^{-6}$  M)]  $\text{Cu}^{2+}$  and  $\text{Hg}^{2+}$  (b) [0, 0.5, 1.25, 2.5, 3.75, and 5 ( $\times 10^{-6}$  M)]  $\text{Cu}^{2+}$  and  $\text{Pb}^{2+}$  (c) [0, 0.5 , and 1.25 ( $\times 10^{-6}$  M)]  $\text{Cu}^{2+}$  and  $\text{Cd}^{2+}$  ions

**Figure S5.** The electronic absorption of aqueous solution of **1** ( $5.0 \times 10^{-6}$  M) upon addition of  $\text{Ca}^{2+}$  (0-16 equivalent)

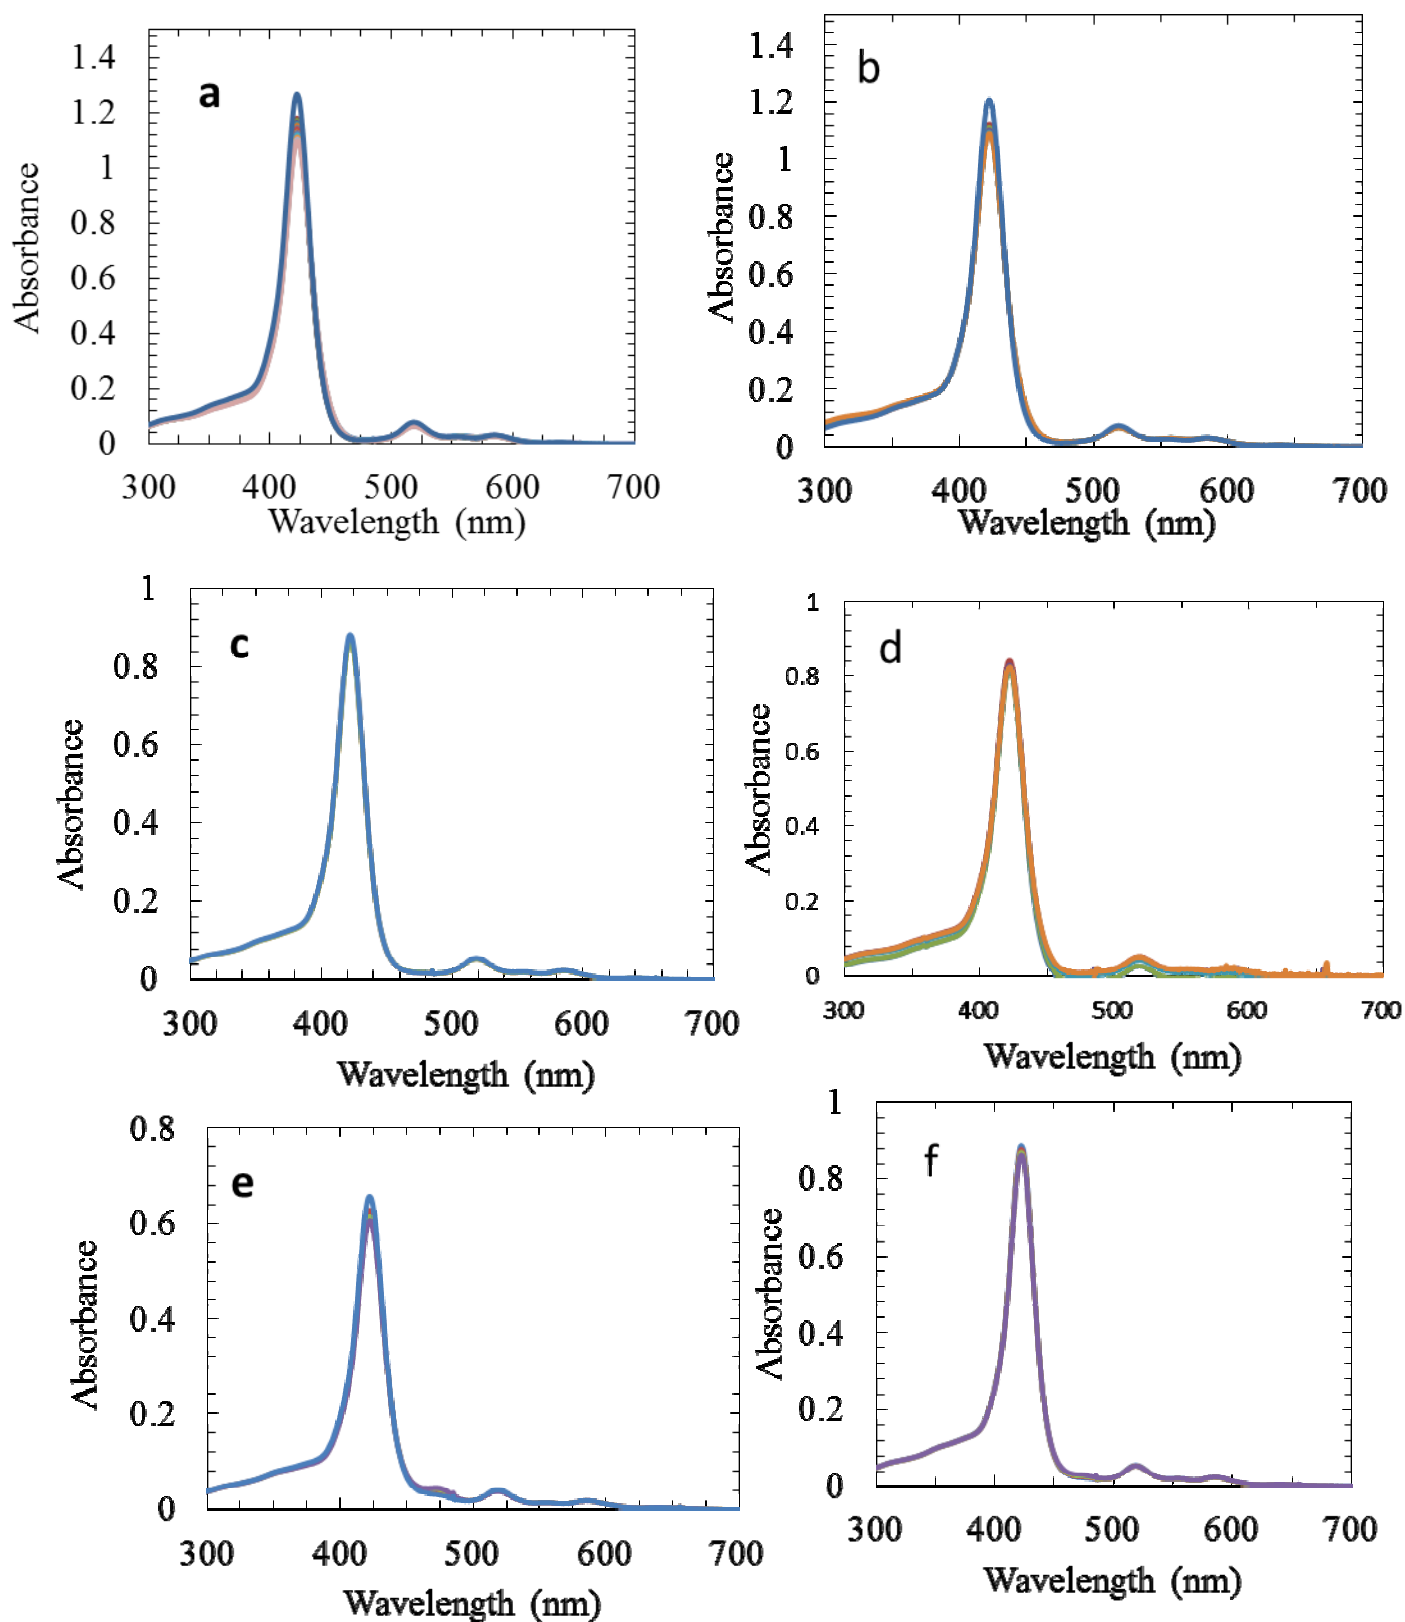

**Figure S1.** The electronic absorption of aqueous solution of **1** upon addition of (a)  $\text{Zn}^{2+}$ , (b)  $\text{Fe}^{3+}$ , (c)  $\text{Ni}^{2+}$ , (d)  $\text{Co}^{2+}$ , (e)  $\text{Na}^{+}$ , and (f),  $\text{K}^{+}$

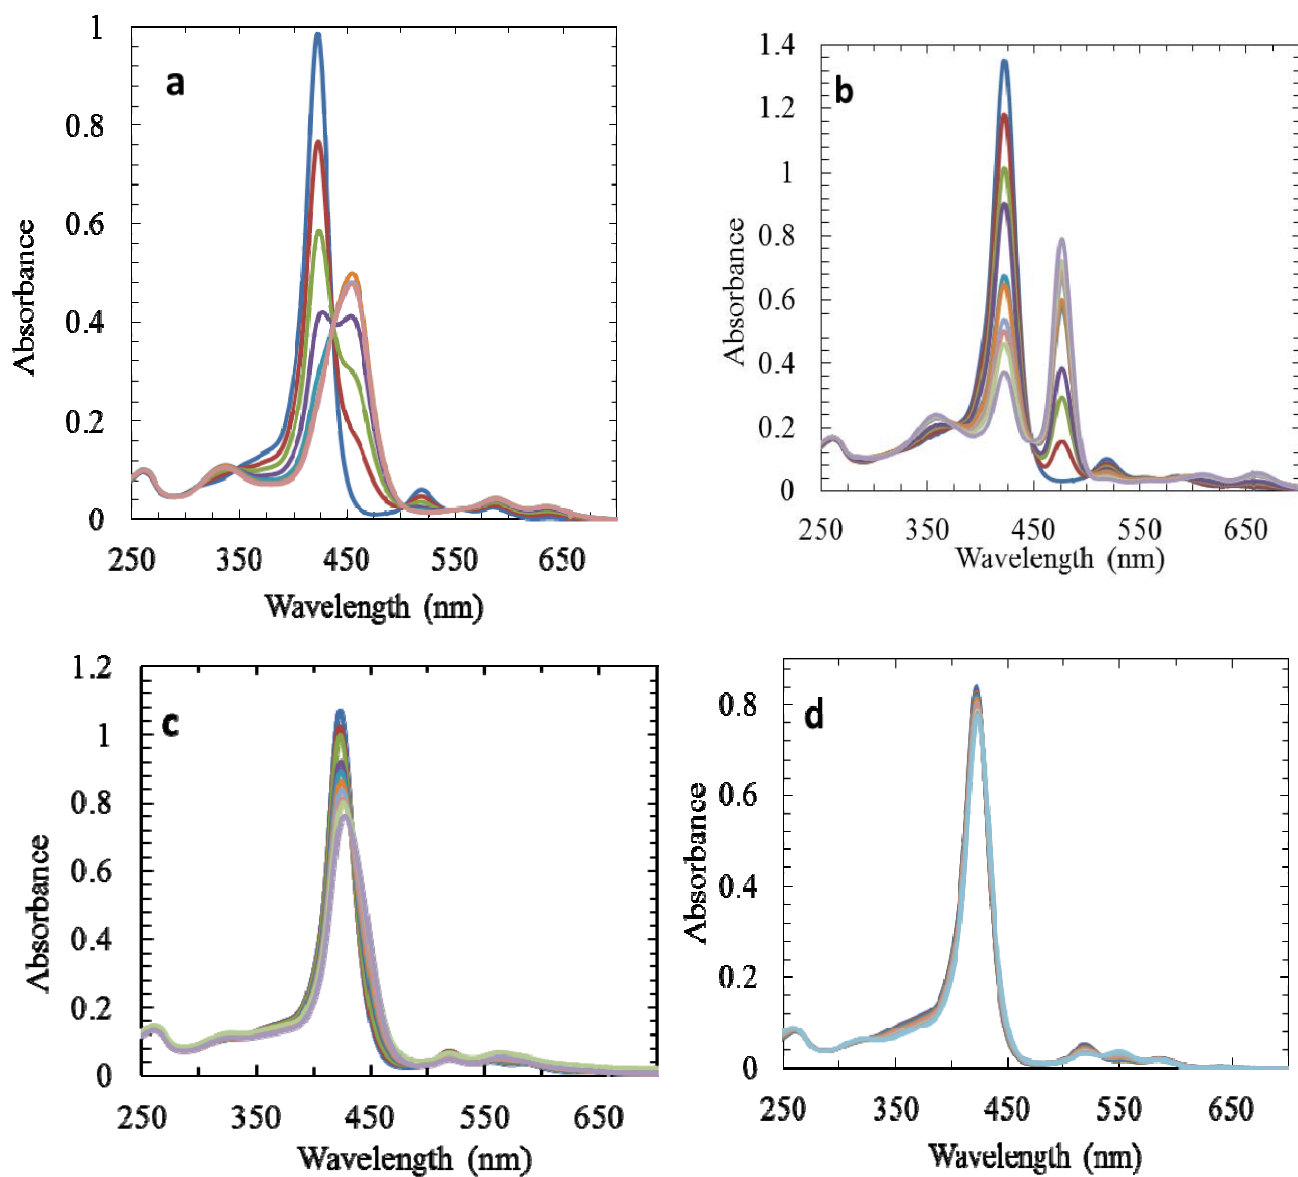

**Figure S2.** The electronic absorption of aqueous solution of **1** ( $5.0 \times 10^{-6}$  M) upon addition of (a) Hg<sup>2+</sup> (0-10 equivalent), (b) Pb<sup>2+</sup> (0-10 equivalent), (c) Cd<sup>2+</sup> (0-10 equivalent), and (d) Cu<sup>2+</sup> (0-10 equivalent) ions

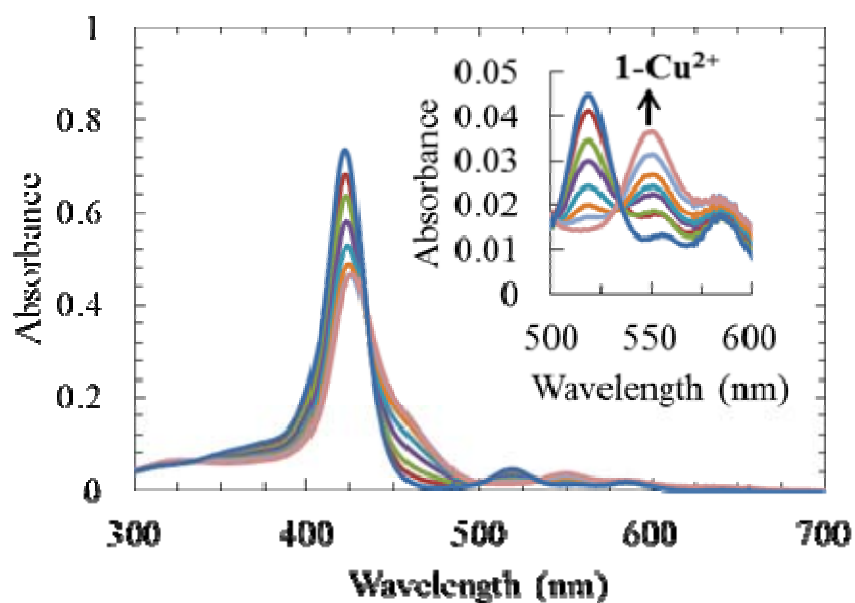

**Figure S3.** The electronic absorption spectra of aqueous solution of **1** ( $5.0 \times 10^{-6}$  M) upon addition of increasing amount [ 0.12, 0.25, 0.38, 0.51, 0.63, 0.89, and 1.27 ( $\times 10^{-6}$  M)] of  $\text{Hg}^{2+}$ ,  $\text{Pb}^{2+}$ ,  $\text{Cd}^{2+}$ , and  $\text{Cu}^{2+}$  ions. The inset displays a zoomed view of the visible portion of the spectra

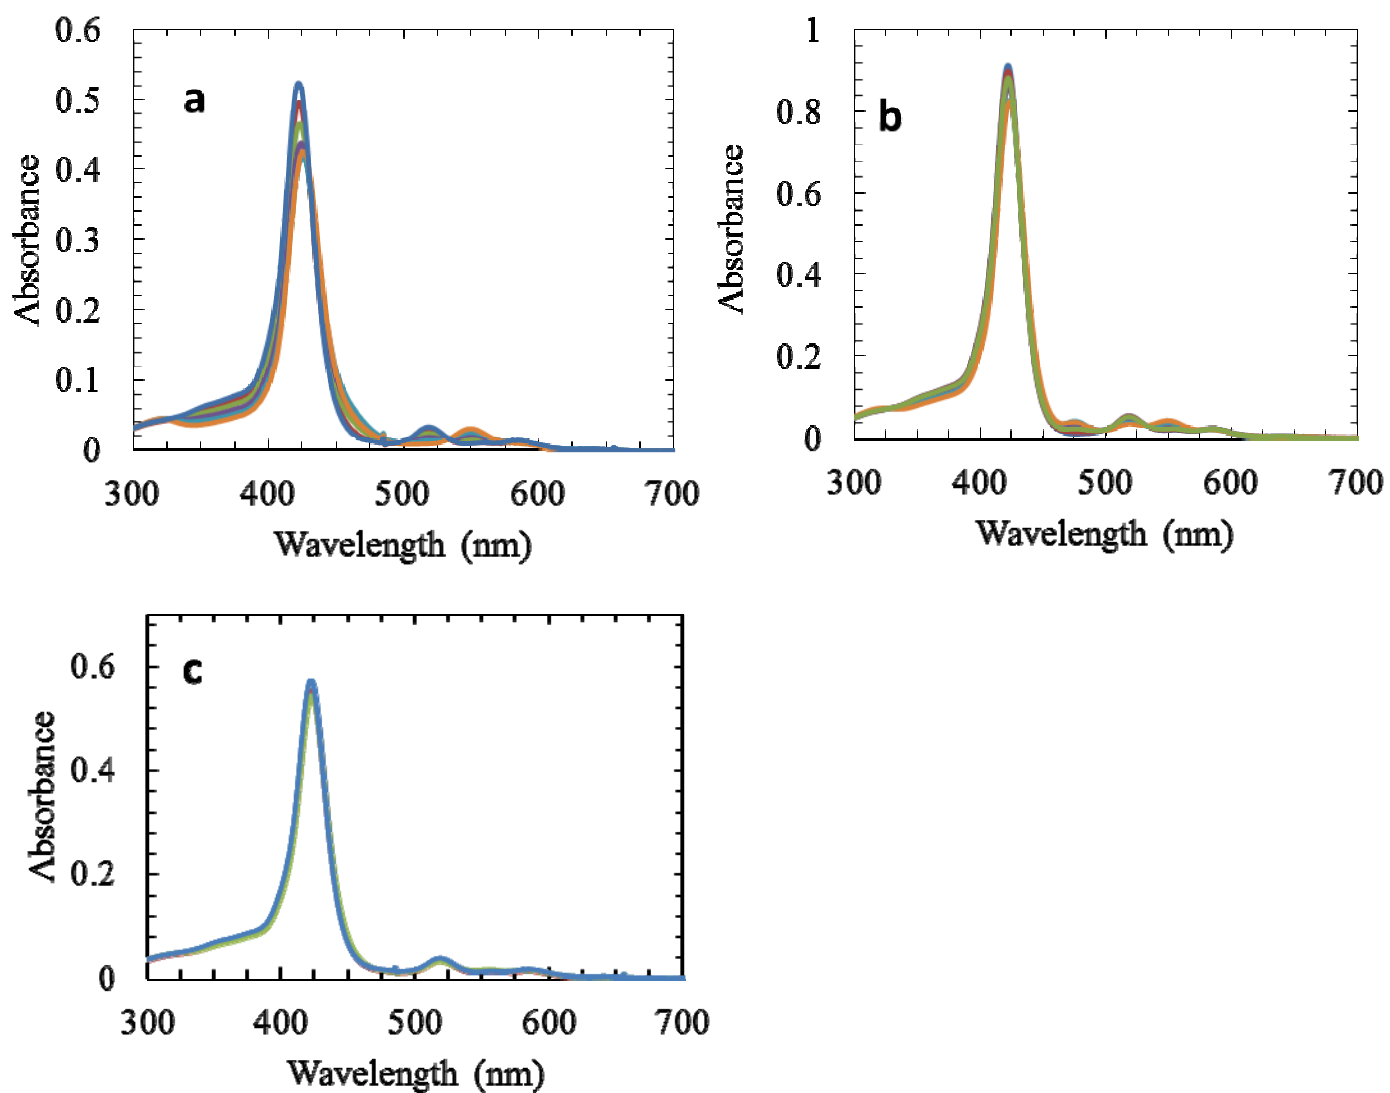

**Figure S4.** The electronic absorption of aqueous solution of **1** ( $5.0 \times 10^{-6}$  M) upon addition of increasing amount (a) [0, 0.5, 1.25, 2, 2.5, and  $3.75 (\times 10^{-6})$  M]  $\text{Cu}^{2+}$  and  $\text{Hg}^{2+}$  (b) [0, 0.5, 1.25, 2.5, 3.75, and  $5 (\times 10^{-6})$  M]  $\text{Cu}^{2+}$  and  $\text{Pb}^{2+}$  (c) [0, 0.5, and  $1.25 (\times 10^{-6})$  M]  $\text{Cu}^{2+}$  and  $\text{Cd}^{2+}$  ions

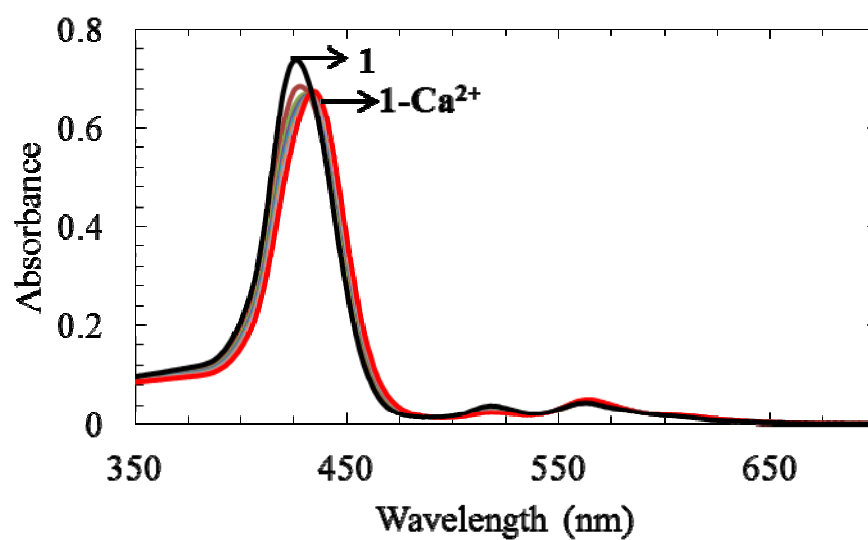

**Figure S5.** The electronic absorption of aqueous solution of **1** ( $5.0 \times 10^{-6}$  M) upon addition of  $\text{Ca}^{2+}$  (0-16  $\mu\text{L}$  of  $1 \times 10^{-3}$  M)
